# Supplementary material for: Bifunctional polypyrrole-based conductive paper towards simultaneous efficient solar-driven water evaporation and electrochemical energy storage
Source: Royal Society of Chemistry journal article supplement (doi:10.1039/d2nr01184k), 2022-01-01
Supplement: d2nr01184k1.pdf [file d2nr01184k1.pdf]

# Supporting Information

## **Bifunctional polypyrrole-based conductive paper towards simultaneously efficient solar-driven water evaporation and electrochemical energy storage**

Jiahong Zhang<sup>1#</sup>, Pengfei Wang<sup>2#</sup>, Yulian Chen<sup>1</sup>, Xiaojiang Mu<sup>1</sup>, Xiaoyang Wang<sup>1,2</sup>,  
Sakae Tanemura<sup>3</sup>, Jianhua Zhou<sup>1\*</sup>, Lei Miao<sup>1\*</sup>

<sup>1</sup>Guangxi Key Laboratory of Information Materials, Engineering Research Center of Electronic Information Materials and Devices, Ministry of Education, School of Material Science and Engineering, Guilin University of Electronic Technology, Guilin 541004, China

<sup>2</sup>Department of Chemical Systems Engineering, Graduate School of Engineering, Nagoya University, Nagoya, 4648603, Japan

<sup>3</sup>Japan Fine Ceramic Center 2-4-1 Mutsuno, Atsuta-ku, Nagoya 456-8587, Japan

# These authors contributed equally to this work.

\*Corresponding Author

E-mail: jianhuazhou@guet.edu.cn; lead contact: miaolei@guet.edu.cn

## Material Characterizations

The surface morphology and microstructure of the samples were observed by scanning electron microscopy (SEMS-4800, Hitachi, Japan). The samples were characterized by Fourier transform infrared (FTIR, Bruker, TENSOR27, U.S.A.) spectra. The characteristic peaks were measured by a Raman scattering measuring device (HORIBA, Lab RAM HR Evolution, France). The absorption spectrum over 250-2500 nm of the samples were recorded via a UV-Vis-NIR spectrometer (JASCO V-570, Japan). The detailed scans for C 1s and N 1s were measured by X-ray photoelectron spectra (Thermo Fisher, ESCALAB250Xi, USA). The water contact angles (WCAs) of different kinds of samples were measured using a contact angle analyzer (JC2000D1, Powereach Co., China). Real-time mass loss monitoring was achieved by an electronic balance (ATX224, Shimadzu, Japan). The electrochemical properties were measured by using an electrochemical workstation (Vretext.One.EIS, Ivium, Holland).

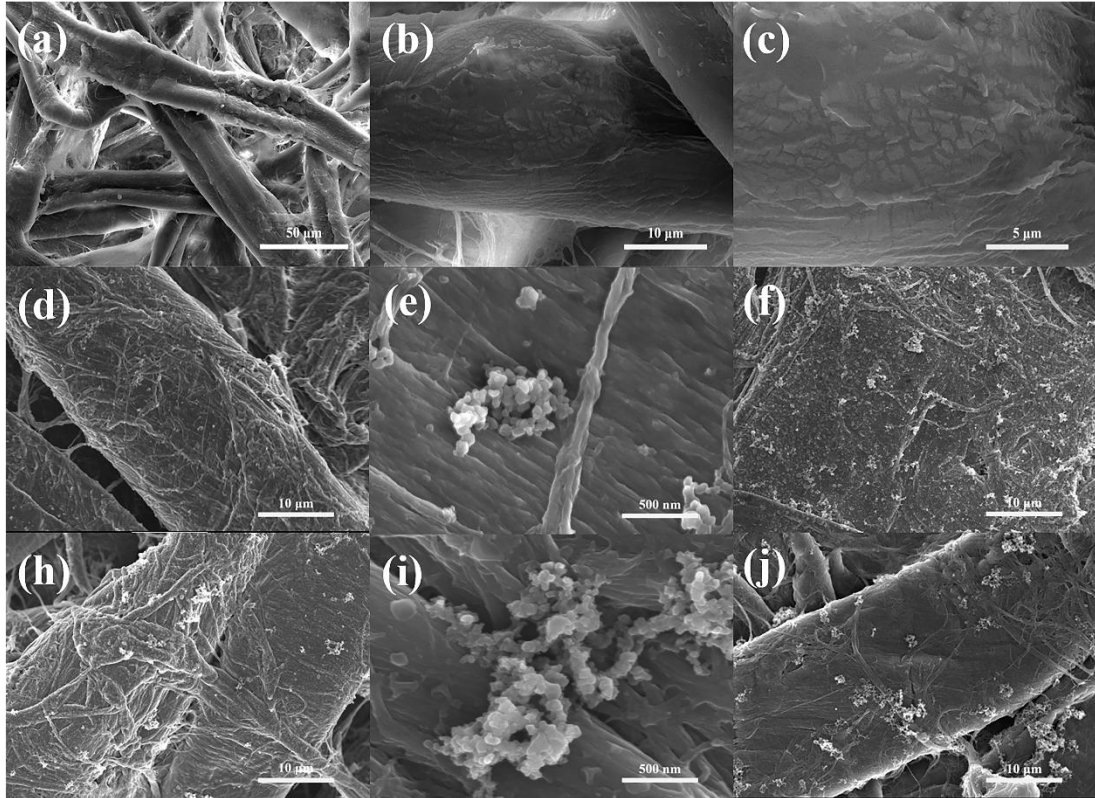

Figure S1. The SEM images for (a-c) the blank filter paper at different magnifications, (c-d) PPy-100 filter paper at different magnifications, (f) PPy-150 filter paper, (h-i) PPy-250 filter paper at different magnifications, (j) PPy-300 filter paper.

Table S1. The loading mass of PPy/filter paper with different dosages.

| Samples | The loading mass (mg cm <sup>-2</sup> ) |
|---------|-----------------------------------------|
| PPy-100 | 2.93                                    |
| PPy-150 | 3.83                                    |
| PPy-200 | 4.24                                    |
| PPy-250 | 4.77                                    |
| PPy-300 | 5.58                                    |

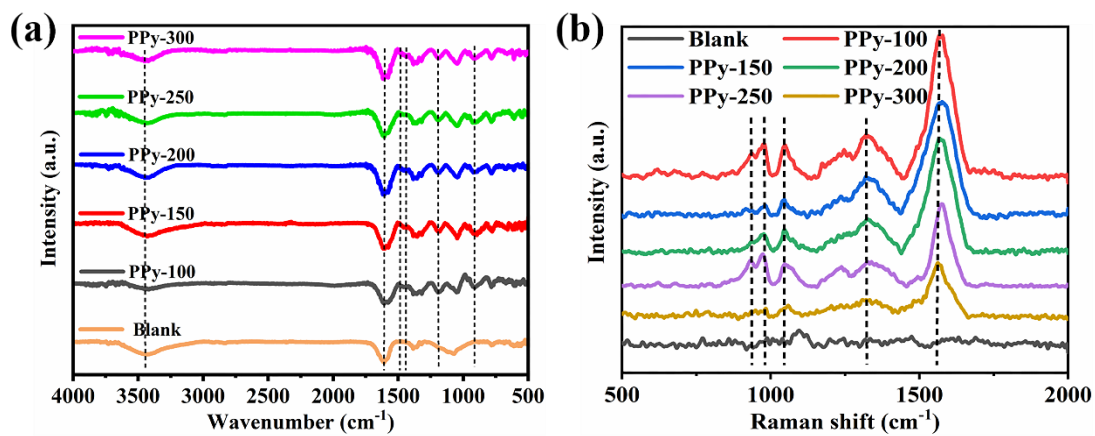

Figure S2. (a) FTIR spectra and (b) Raman spectra for the blank filter paper, PPy-100, 150, 200, 250, 300 filter paper.

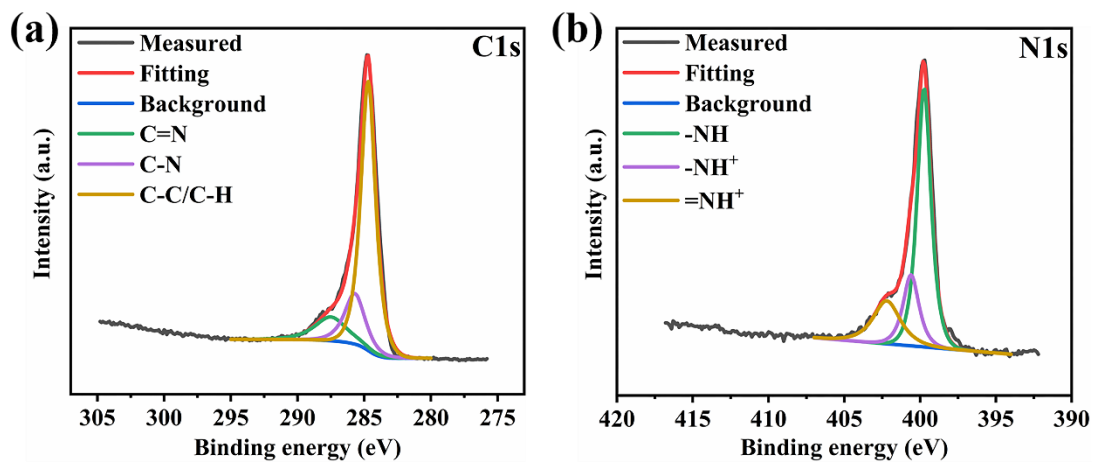

Figure S3. The XPS survey spectra for (a) C 1s, (b) N 1s of the PPy-200 filter paper.

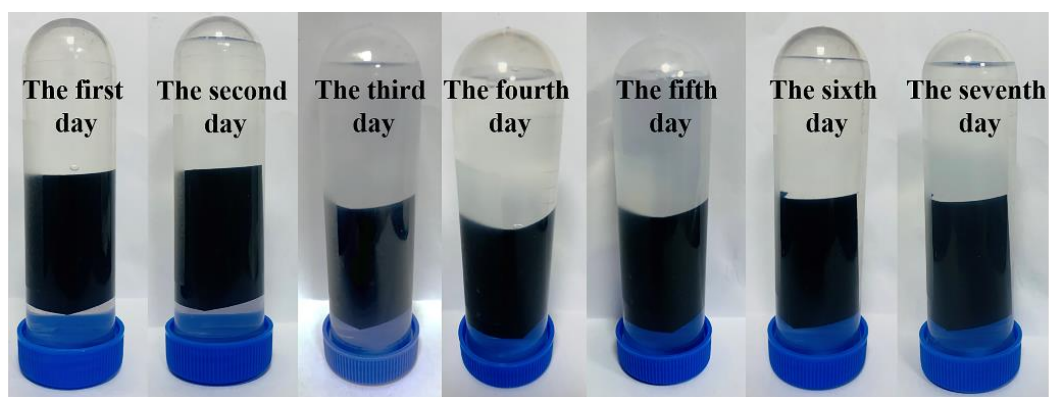

Figure S4. The digital photos of the PPy/filter paper soaked in water for 7 days.

Table S2. Comparison of performance of flexible PPy-based materials.

| Materials                              | Capacitance (mF cm <sup>-2</sup> )                  | Reference |
|----------------------------------------|-----------------------------------------------------|-----------|
| PPy/RGO/bacterial cellulose paper      | 2100 mF cm <sup>-2</sup> at 2 mA cm <sup>-2</sup>   | 1         |
| Ni-CAT-MOF/PPy foam                    | 1050 mF cm <sup>-2</sup> at 0.5 mA cm <sup>-2</sup> | 2         |
| PPy/MoS <sub>2</sub> /Carbon cloth     | 1150.4 mF cm <sup>-2</sup> at 1 mA cm <sup>-2</sup> | 3         |
| PPy/Air-Laid paper                     | 3100 mF cm <sup>-2</sup> at 1 mA cm <sup>-2</sup>   | 4         |
| ECNT/PPy                               | 965.3 mF cm <sup>-2</sup> at 1 mA cm <sup>-2</sup>  | 5         |
| Ni <sub>3</sub> S <sub>2</sub> @PPy/NF | 3148.0 mF cm <sup>-2</sup> at 2 mA cm <sup>-2</sup> | 6         |
| MoS <sub>2</sub> -DBS-PPy film         | 1200 mF cm <sup>-2</sup> at 0.5 mA cm <sup>-2</sup> | 7         |



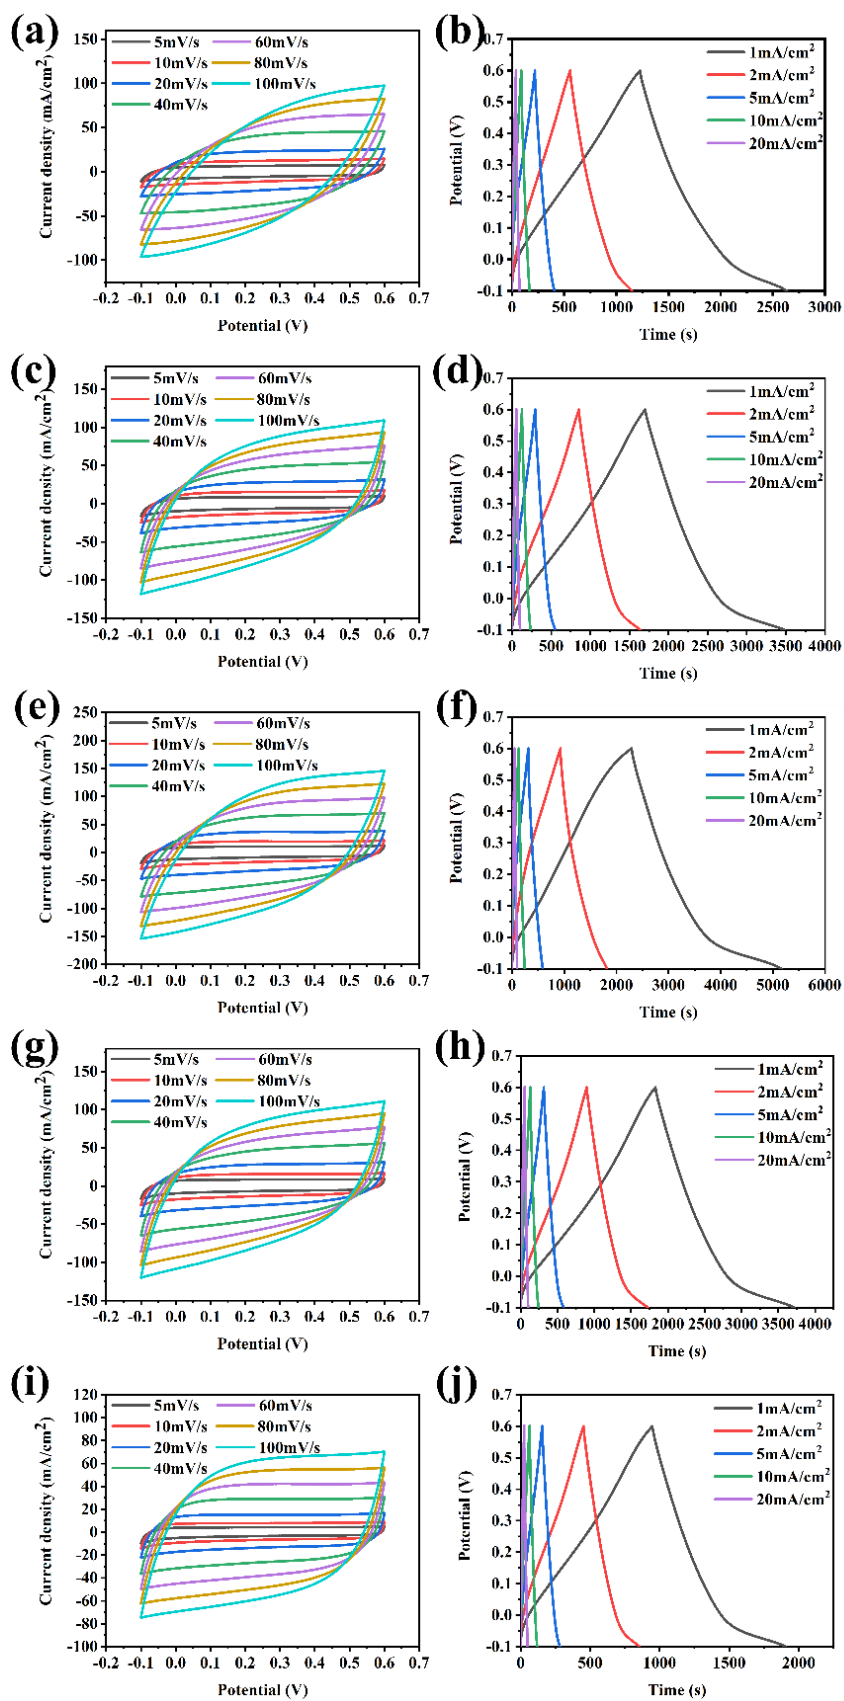

Figure S5. CV curves at different scan rates and GCD curves at different current densities for PPy-100 (a-b), 150 (c-d), 200 (e-f), 250 (g-h), 300 (i-j) filter paper, respectively.

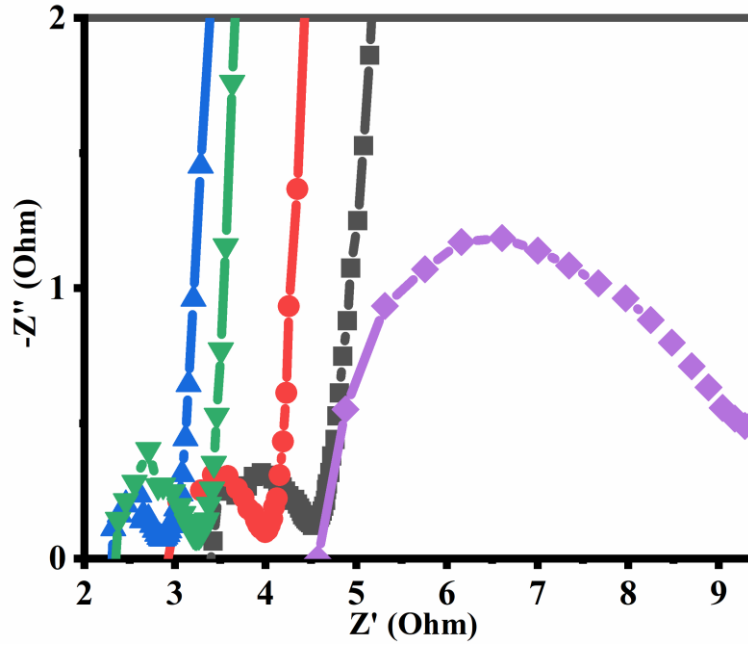

Figure S6. The local magnification image of the EIS curve for the PPy-100, 150, 200, 250, 300 filter paper electrode in the high-frequency band.

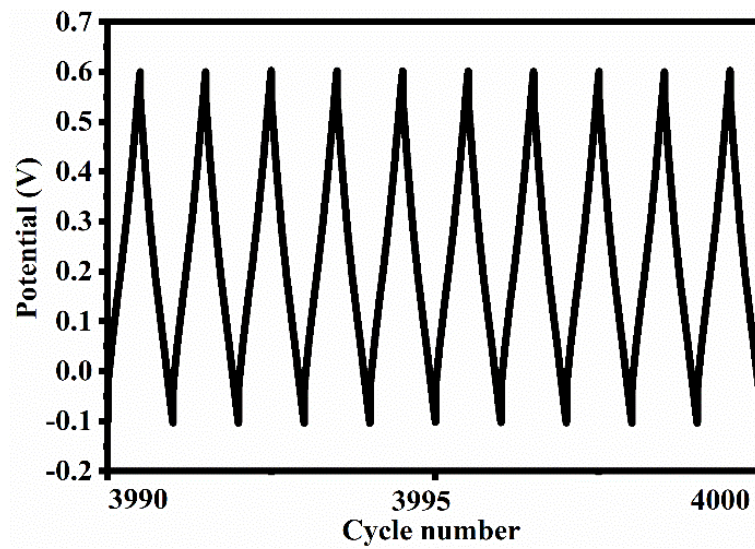

Figure S7. The GCD curve of the PPy-200 filter paper electrode from the 3990<sup>th</sup> to the 4000<sup>th</sup> cycle.

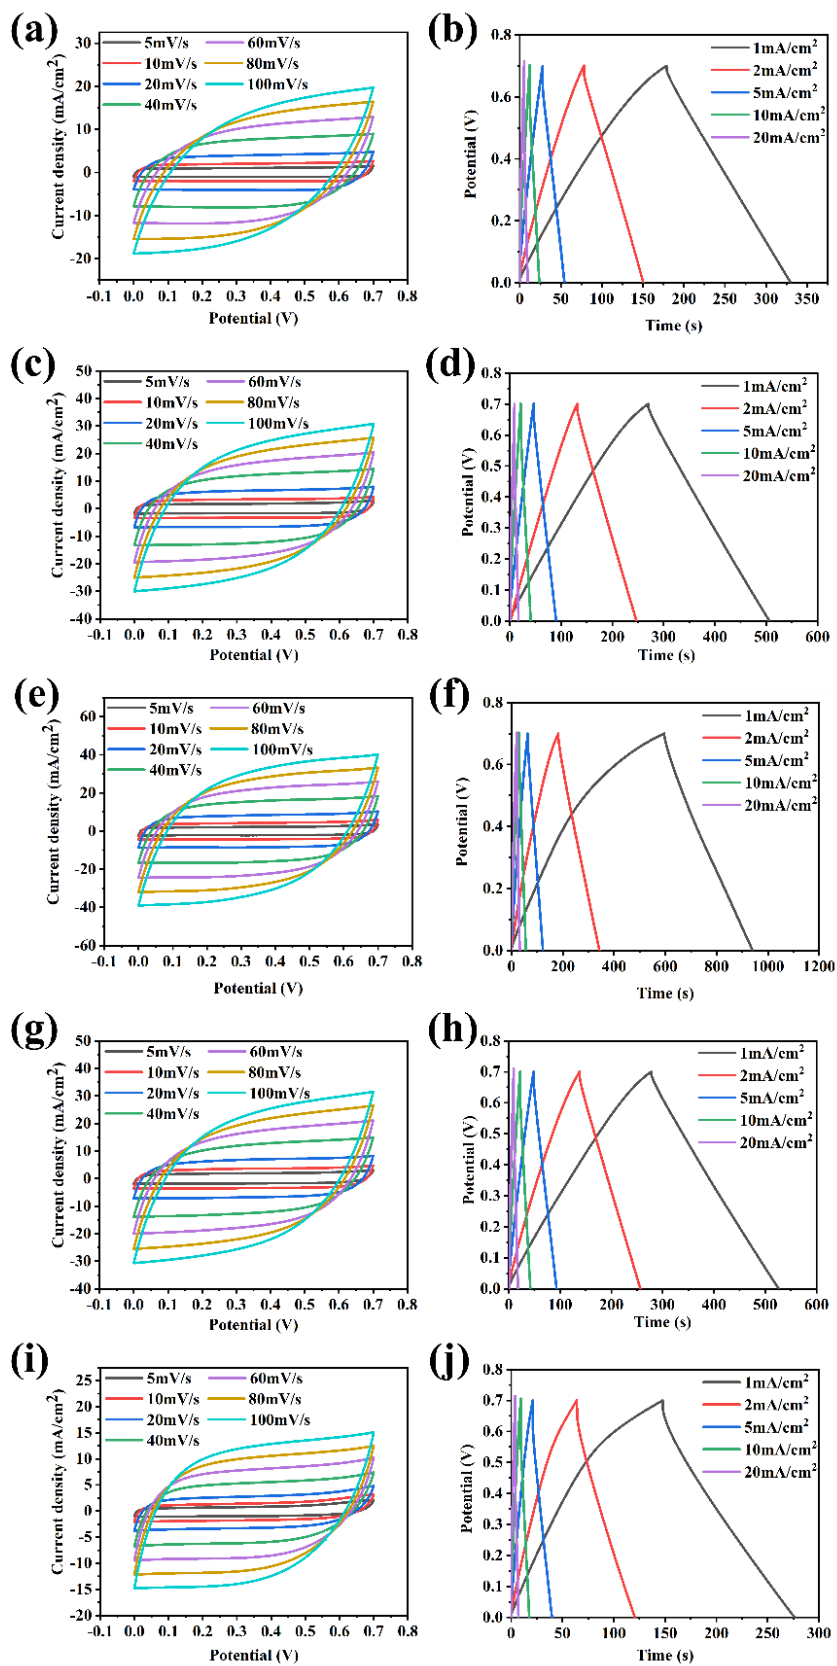

Figure S8. CV curves at different scan rates and GCD curves at different current densities for PPy-100 (a-b), 150 (c-d), 200 (e-f), 250 (g-h), 300 (i-j) filter paper based symmetric aqueous supercapacitor, respectively.

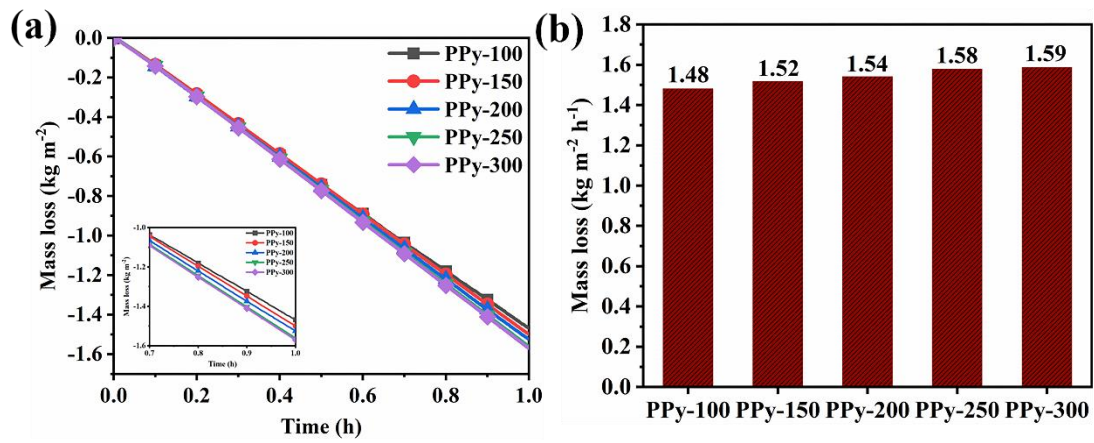

Figure S9. (a) The mass loss curve of pure water, (b) the solar evaporation rates of pure water for PPy-100, 150, 200, 250, 300 under  $1 \text{ kW m}^{-2}$ , inset: a local magnification image of the solar evaporation rates of pure water.

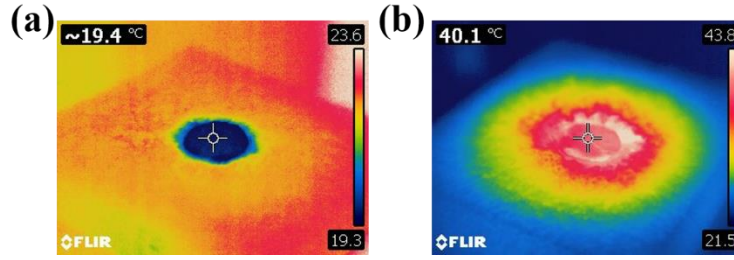

Figure S10. The IR images of the PP-PPy-200 under the illumination of  $1 \text{ kW m}^{-2}$  at (a) 0 min and (b) 60 min.

Heat conduction, radiation and convection are existing in the solar-driven water evaporation process.

#### (1) Heat conduction

The heat conduction could be calculated by the following formula:

$$q_{con} = \frac{cm\Delta T}{At} \quad (\text{S-1})$$

In this formula:

$q_{con}$  is the heat flux ( $\text{W m}^{-2}$ );

$c$  is the specific heat capacity ( $4.2 \times 10^3 \text{ J kg}^{-1} \text{ K}^{-1}$ );

$m$  is the bulk water mass (kg);

$A$  is the heat conduction area ( $\text{m}^{-2}$ );

$t$  is the heat time (s);

$\Delta T$  is the temperature change of bulk water (K).

#### (2) Radiation

The radiation of solar-driven water evaporation could be calculated by the following formula:

$$q_{rad} = \varepsilon\sigma(T_2^4 - T_1^4) \quad (\text{S-2})$$

In this formula:

$q_{rad}$  is the radiation density ( $\text{W m}^{-2}$ );

$\sigma$  is the Stefan-Boltzmann constant ( $5.67 \times 10^{-8} \text{ W m}^{-2} \text{ K}^{-4}$ );

$\varepsilon$  is the emissivity of material; In this study, the emissivity of PP-PPy-200 is 0.593.

$T_2$  is the surface temperature of solar photothermal conversion material (K);

$T_1$  is the vapor temperature (K). In this study, the vapor temperature of PP-PPy-200 is 312.45 K.

### (3) Convection

The convection of solar-driven water evaporation could be calculated by the following formula:

$$q_{conv} = h(T_2 - T_1) \quad (\text{S-3})$$

In this formula:

$q_{conv}$  is the convection density ( $\text{W m}^{-2}$ );

$h$  is the coefficient of convection ( $\text{W m}^{-2} \text{K}^{-1}$ ). In this study, the coefficient of convection is  $5 \text{ W m}^{-2} \text{K}^{-1}$  according to previous studies.

$T_2$  is the surface temperature of solar photothermal conversion material (K);

$T_1$  is the vapor temperature (K).

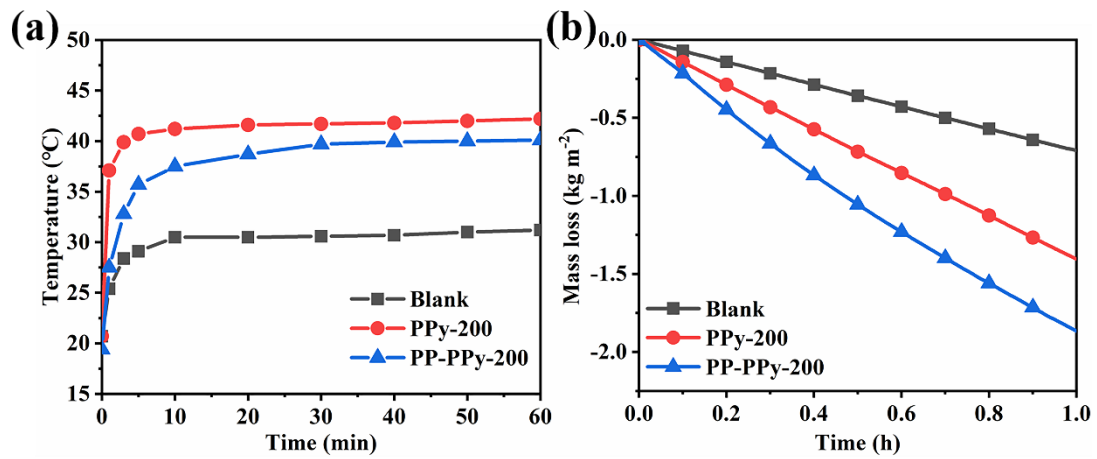

Figure S11. (a) Surface temperature of pure water, (b) the mass loss curve of pure water sea water in the East China Sea.



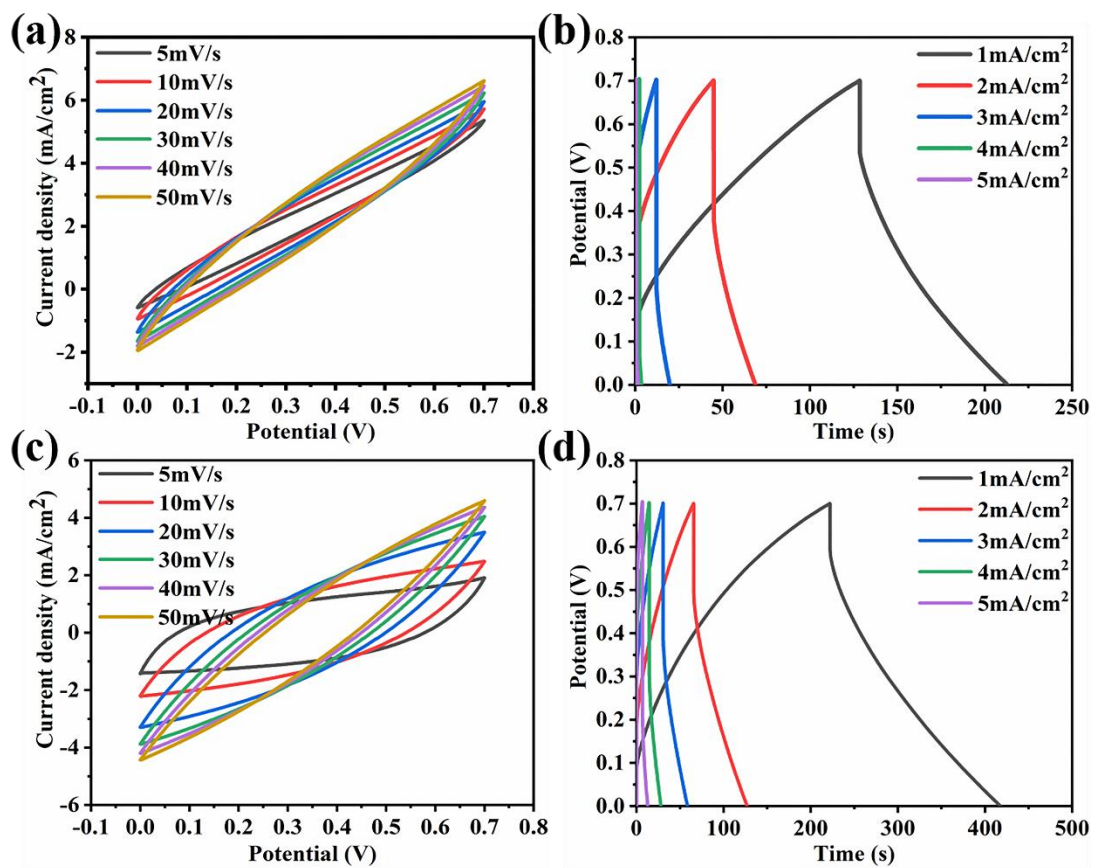

Figure S12. CV curves at different scan rates and GCD curves at different current densities for PP-PPy-200 (a-b) in the dark and (c-d) under one sun illumination, respectively.

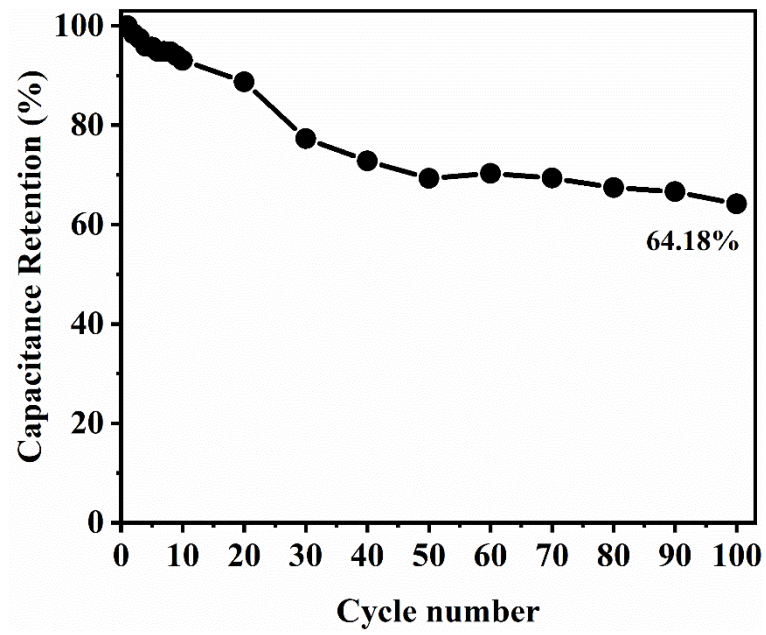

Figure S13. The cycling performance of PP-PPy-200 under one solar illumination.

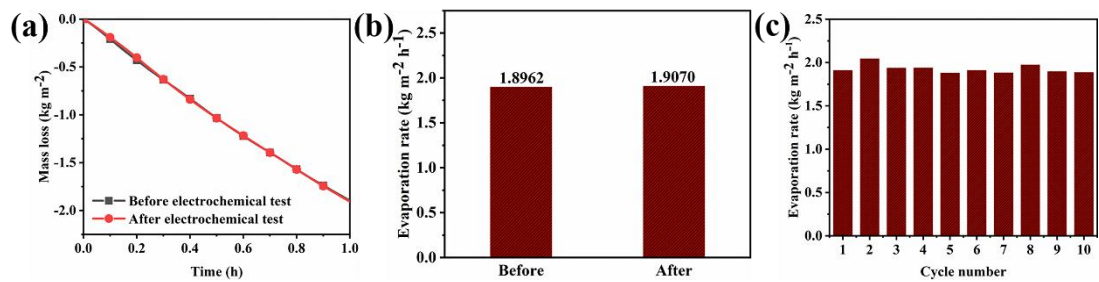

Figure 14. Solar-thermal evaporation performance of PP-PPy-200. (a) The mass loss curve before and after the GCD test, (b) the solar evaporation rates before and after the GCD test, (c) the cyclic evaporation performances of PP-PPy-200 under  $1 \text{ kW m}^{-2}$ .

## References

1. L. N. Ma, R. Liu, H. J. Niu, M. Zhao and Y. D. Huang, *Compos. Sci. Technol.*, 2016, **137**, 87-93.
2. T. Yue, A. I. Douka, K. Qi, Y. B. Qiu, X. P. Guo and B. Y. Xia, *J. Mater. Chem. A*, 2021, **9**, 21799-21806.
3. X. H. Yan, J. Y. Miao, J. J. Wang, H. Jiang, M. Y. You, Y. H. Zhu and J. M. Pan, *Mater. Sci. Eng. B-Adv.*, 2021, **269**, 115166.
4. Y. X. Chen, K. F. Cai, C. C. Liu, H. J. Song and X. W. Yang, *Adv. Energy Mater.*, 2017, **7**, 1701247.
5. Z.-H. Chang, D.-Y. Feng, Z.-H. Huang and X.-X. Liu, *Chem. Eng. J.*, 2018, **337**, 552-559.
6. J. Ren, M. Shen, Z. Li, C. Yang, Y. Liang, H.-E. Wang, J. Li, N. Li and D. Qian, *J. Power Sources*, 2021, **501**, 230003.
7. Y. Tian, J. Liu, X. Song, L. Zhao, P. Zhang and L. Gao, *Compos. Sci. Technol.*, 2020, **197**, 108263.
